# Supplementary material for: Therapeutic potential of CPI-613 for targeting tumorous mitochondrial energy metabolism and inhibiting autophagy in clear cell sarcoma
Source: PLoS One. 2018 Jun 7;13(6):e0198940. doi: 10.1371/journal.pone.0198940 (PMC5991736; doi:10.1371/journal.pone.0198940)
Supplement: S3 Table — Tumor volumes of control and CPI613-Chloroquine treated mice. (XLSX) [file pone.0198940.s007.xlsx]

## Sheet: Sheet1
	Feb 7th	Feb 21st	Fen 28th	March 3rd	March 6th
control	4.186	33.488	150.696	230.753	423.833
	4.186	18.837	78.488	307.671	759.759
	0.523	1.047	78.488	205.144	423.833
	0.523	0.523	94.97	74.171	368.368
	0.523	0.523	205.144	104.65	466.216
mean	1.9882	10.8836	121.557	184.478	488.402
S.D.	2.00631	14.88	55.3458	95.2433	155.622
CPI+chlroquine	6.279	14.128	12.588	50.232	131.859
	4.186	18.837	6.279	33.488	91.569
	4.186	8.372	41.86	41.86	78.488
	0.523	0.523	6.279	33.488	113.022
	0.523	6.279	33.488	41.86	98.109
mean	3.1394	9.6278	20.0988	40.1856	102.609
S.D.	2.53668	7.08431	16.5167	7.00452	20.5423
